# Supplementary material for: Identifying mental health and substance use disorders using emergency department and hospital records: a population-based retrospective cohort study of diagnostic concordance and disease attribution
Source: PubMed Central journal article supplement — BMJ Open. 2019 Jul 11;9(7):e030530. doi: 10.1136/bmjopen-2019-030530 (PMC6629422; doi:10.1136/bmjopen-2019-030530), 2019-07-11
Supplement: bmjopen-2019-030530supp001.pdf [file bmjopen-2019-030530supp001.pdf]

**Appendix for the manuscript “*Identifying mental health and substance use disorders using emergency department and hospital records: a population-based retrospective cohort study of diagnostic concordance and disease attribution*”**

**Appendix 1**

**Table 1:** Service hours and mental health services available in 11 hospitals/acute care clinics under the purview of VCH

| <b>Emergency department*</b>                                | <b>No. of ED visits in the past year (No. visits resulting in hospital admission in the past year)</b> | <b>Hours</b> | <b>Psychiatrists or Mental health crisis teams on site?</b>                                                                                                                                                                                                                                                                                                                                                                                                                                                                     |
|-------------------------------------------------------------|--------------------------------------------------------------------------------------------------------|--------------|---------------------------------------------------------------------------------------------------------------------------------------------------------------------------------------------------------------------------------------------------------------------------------------------------------------------------------------------------------------------------------------------------------------------------------------------------------------------------------------------------------------------------------|
| St Paul’s Hospital                                          | 210488 (29967)                                                                                         | 24 hours     | Yes. The emergency department contains an Acute Behavioral Stabilization Unit which provides specialized care for patients with complex mental health and substance use needs. The unit is managed by Emergency with the staffing support being an interdisciplinary team of emergency physicians, emergency nurses, psychiatrists, registered psychiatric nurses (or equivalent), psychiatric assessment nurses and workers, as well as input from consultative services such as the specialized Addictions Consultation Team. |
| Vancouver General Hospital                                  | 91836 (17832)                                                                                          | 24 hours     | Yes. Psychiatric Emergency Assessment & Triage (PEAT) service is a co-managed space in the VGH Emergency Department for assessing and triaging ED clients who present with MHSU conditions.                                                                                                                                                                                                                                                                                                                                     |
| Mount St. Joseph Hospital                                   | 22008 (2822)                                                                                           | 08:00-20:00  | Yes. Geriatric psychiatry service: provides acute care and consultation, initial assessment, and follow-up care for ambulatory patients over the age of 65 who are experiencing complex psychiatric disorders.                                                                                                                                                                                                                                                                                                                  |
| Lions Gate Hospital                                         | 15594 (2167)                                                                                           | 24 hours     | Yes. There is a Psychiatric Emergency Program which provides access to prompt psychiatric assessments through the emergency department at Lions Gate Hospital. Mental Health nurses staffed in the emergency department provide mental health assessment in consultation with the on call psychiatrist.                                                                                                                                                                                                                         |
| Richmond Hospital                                           | 11689 (2093)                                                                                           | 24 hours     | Yes. The Psychiatry Assessment and Emergency Unit provide short-term assessment, stabilization and treatment services for individuals experiencing a psychiatric/mental health crisis. Provides a 4-bed brief stay (72 hours or less) unit for assessment, stabilization and treatment of individuals experiencing a psychiatric/mental health crisis. The interdisciplinary team is able to access both hospital and community resources, on an as needed basis.                                                               |
| Powell River General Hospital                               | 1856 (142)                                                                                             | 24 hours     | Yes. In-Patient Psychiatry: a 7-bed unit on the 4th Floor of the Powell River General Hospital provides acute care for people suffering from an acute psychiatric illness that are unable to be cared for at home or in supportive community programs.                                                                                                                                                                                                                                                                          |
| University of British Columbia (UBC) Health Sciences Centre | 3996 (151)                                                                                             | 8:00-20:00   | No.                                                                                                                                                                                                                                                                                                                                                                                                                                                                                                                             |
| Squamish General Hospital                                   | 555 (49)                                                                                               | 24 hours     | No. Squamish General Hospital does not have a psychiatric ward or mental health beds. People in                                                                                                                                                                                                                                                                                                                                                                                                                                 |

|                        |            |            |                                                                                                                                                                                                                                                                                                                                                                                                                                                                                                  |
|------------------------|------------|------------|--------------------------------------------------------------------------------------------------------------------------------------------------------------------------------------------------------------------------------------------------------------------------------------------------------------------------------------------------------------------------------------------------------------------------------------------------------------------------------------------------|
|                        |            |            | acute mental health distress will be transported from the Squamish emergency department to Lions Gate Hospital. If the issue is not acute, emergency room doctors can help the patient access a treatment team that includes two psychiatrists in Squamish.                                                                                                                                                                                                                                      |
| Whistler D & T Centre  | 287 (9)    | 8:00-20:00 | Yes. The Whistler Health Centre which provides emergency care also provides Mental Health and Substance Use services at the same location. Outpatient individual and group counseling for people with mental health and/or addiction problems. It also has an Adult Mental Health and Substance Use Program, which serves clients over the age of 19 who are diagnosed with a major mental illness and experiencing significant problems that interfere with their functioning in the community. |
| Pemberton D & T Centre | 161 (9)    | 8:30-20:30 | The Pemberton Health Centre which provides emergency care also provides Mental Health and Substance Use services at the same location. Outpatient individual and group counselling are available for people with mental health and/or addiction problems.                                                                                                                                                                                                                                        |
| Sechelt Hospital       | 1052 (150) | 24 hours   | The Psychiatry Assessment and Emergency Unit provides short-term assessment, stabilization, and treatment services for individuals experiencing a psychiatric/mental health crisis. A mental health emergency services nurse is on site Monday to Friday.                                                                                                                                                                                                                                        |

\*Data for Mount St. Joseph Hospital, Powell River General Hospital and St. Paul Hospital are available from April 1 2009, onward. Data for Sechelt Hospital are from October 17, 2012 onward. Data for Whistler D & T Centre, and Pemberton D & T Centre are from April 1 2015 onward.

**Table 2.** Classification of any and specific types of mental and substance use disorders based on ICD-9-CA and ICD-10-CA codes.

| Health conditions                                 | ICD-9-CA                                                                                                               | ICD-10-CA                                                                                     |
|---------------------------------------------------|------------------------------------------------------------------------------------------------------------------------|-----------------------------------------------------------------------------------------------|
| Mental health and substance use disorders         | 290-319                                                                                                                | F00-F99                                                                                       |
| Any selected substance use disorders              |                                                                                                                        |                                                                                               |
| Alcohol use disorders                             | 291, 303, 305.0, 357.5, 425.5, 535.3, 571.0-571.3, 655.4,760.71,V65.42                                                 | F10, Z50.2, Z71.4, Z72.1,G31.2, G62.1, G72.1, I42.6, K29.2, K70, K86.0, O35.4, P04.3, Q86.0   |
| Other substance use disorders <sup>b</sup>        | 292, 304, 305.2-305.9, 965.0, 969.x (4,6,7), 970.81, E850.0-E850.2, E853.2, E854.1,E854.2, 648.3, 760.73,760.75, 779.5 | F11-F16, F19, T40, T42.4, T43.6, X42, X62, Y12, Z50.3, Z71.5, Z72.2, P04.4, P96.1             |
| Opioid use disorder                               | 304.0, 304.7, 305.5, 965.0, E850.0-E850.2                                                                              | F11, X42 & (T40.0-T40.4 or T40.6), X62 & (T40.0-T40.4 or T40.6), Y12 & (T40.0-T40.4 or T40.6) |
| Any selected mental health disorders              |                                                                                                                        |                                                                                               |
| Mood disorders <sup>c</sup>                       | 296, 311,300.4                                                                                                         | F30–F31 F32–F33, F34, F38, F39                                                                |
| Depression                                        | 296.2, 296.3, 296.5,311, 300.4                                                                                         | F31.3-F31.5, F32,F33, F34.1                                                                   |
| Psychoses                                         | 295,297,298                                                                                                            | F20, F22-F25, F28,F29                                                                         |
| Neurotic/stress/somatoform disorders <sup>d</sup> | 300, 308, 309,                                                                                                         | F40-45, F48                                                                                   |
| Anxiety disorders                                 | 300.0, 300.2                                                                                                           | F40, F41                                                                                      |
| Personality disorders                             | 301                                                                                                                    | F60–F62, F69, F21                                                                             |

<sup>b</sup> Included opioid use disorder; <sup>c</sup> Included depression; <sup>d</sup> Included anxiety disorders.

## Appendix 2

**Table 1A.** Identification of mental health and substance use disorders using hospital (any diagnosis codes) and ED records among DTES cohort participants (using data from April 1<sup>st</sup> 2012 onward) (N=56,875).<sup>a</sup>

| Health conditions                                      | Total                 | Proportion of individuals identified by data source |                       |                                    |
|--------------------------------------------------------|-----------------------|-----------------------------------------------------|-----------------------|------------------------------------|
|                                                        | Number of individuals | Hospital records only N (%)                         | ED records only N (%) | Both hospital and ED records N (%) |
| Mental health and substance use disorders              | 12355                 | 3632 (29.4)                                         | 3388 (27.4)           | 5335 (43.2)                        |
| Any substance use disorders                            | 9655                  | 3844 (39.8)                                         | 2872 (29.7)           | 2939 (30.4)                        |
| Alcohol use disorders                                  | 4587                  | 1928 (42.0)                                         | 1518 (33.1)           | 1141 (24.9)                        |
| Non-alcohol substance use disorders <sup>b</sup>       | 7418                  | 3686 (49.7)                                         | 1813 (24.4)           | 1919 (25.9)                        |
| Opioid use disorder                                    | 4317                  | 2079 (48.2)                                         | 1360 (31.5)           | 878 (20.3)                         |
| Any mental health disorders                            | 6225                  | 1370 (22.0)                                         | 1890 (30.4)           | 2965 (47.6)                        |
| Mood disorders <sup>c</sup>                            | 2709                  | 1063 (39.2)                                         | 869 (32.1)            | 777 (28.7)                         |
| Depression                                             | 2015                  | 719 (35.7)                                          | 860 (42.7)            | 436 (21.6)                         |
| Psychoses                                              | 3438                  | 513 (14.9)                                          | 1077 (31.3)           | 1848 (53.8)                        |
| Neurotic, stress and somatoform disorders <sup>d</sup> | 2434                  | 1039 (42.7)                                         | 1150 (47.2)           | 245 (10.1)                         |
| Anxiety disorders                                      | 1797                  | 412 (22.9)                                          | 1265 (70.4)           | 120 (6.7)                          |
| Personality disorders                                  | 1260                  | 1062 (84.3)                                         | 80 (6.3)              | 118 (9.4)                          |

<sup>a</sup> Cases identified using at least one hospital or emergency department record of diagnosis code indicating a case; <sup>b</sup> Included opioid use disorder;

<sup>c</sup> Included depression; <sup>d</sup> Included anxiety disorders.

**Table 2A.** Concordance between the primary diagnosis code assigned in the ED and any diagnosis codes assigned at hospital discharge following an ED visit for any mental health and substance use-related conditions (N=16926, 48116 pairs).

| Health conditions                                 | Condition indicated in |                  |                           |                             | Concordance statistics |                   |                   |                   | Validity statistics<br>(assume hospital discharge diagnosis as "gold-standard") |                         |                                          |                                          |
|---------------------------------------------------|------------------------|------------------|---------------------------|-----------------------------|------------------------|-------------------|-------------------|-------------------|---------------------------------------------------------------------------------|-------------------------|------------------------------------------|------------------------------------------|
|                                                   | Any<br>N (%)           | ED only<br>N (%) | Hospital<br>only<br>N (%) | ED and<br>hospital<br>N (%) | Overall<br>agree       | Positive<br>agree | Negative<br>agree | Kappa<br>(95% CI) | Sensitivity<br>(95% CI)                                                         | Specificity<br>(95% CI) | Positive<br>predictive value<br>(95% CI) | Negative<br>predictive value<br>(95% CI) |
| Mental health and substance use disorders         | 30775 (64.0)           | 214 (0.4)        | 17530 (36.4)              | 13031 (27.1)                | 0.63                   | 0.59              | 0.66              | 0.34 (0.34,0.35)  | 0.43 (0.42,0.43)                                                                | 0.99 (0.99,0.99)        | 0.98 (0.98,0.99)                         | 0.50 (0.49,0.50)                         |
| Any selected substance use disorders              | 23733 (49.3)           | 78 (0.2)         | 21926 (45.6)              | 1729 (3.6)                  | 0.54                   | 0.14              | 0.69              | 0.07 (0.07,0.07)  | 0.07 (0.07,0.08)                                                                | 1.00 (1.00,1.00)        | 0.96 (0.95,0.97)                         | 0.53 (0.52,0.53)                         |
| Alcohol use disorders                             | 8127 (16.9)            | 30 (0.1)         | 7975 (16.6)               | 122 (0.3)                   | 0.83                   | 0.20              | 0.90              | 0.16 (0.16,0.17)  | 0.11 (0.10,0.12)                                                                | 1.00 (1.00,1.00)        | 0.94 (0.92,0.95)                         | 0.83 (0.82,0.83)                         |
| Other substance use disorders <sup>b</sup>        | 9320 (19.4)            | 66 (0.1)         | 8228 (17.1)               | 1026 (2.1)                  | 0.63                   | 0.07              | 0.77              | 0.04 (0.04,0.04)  | 0.04 (0.03,0.04)                                                                | 1.00 (1.00,1.00)        | 0.92 (0.90,0.94)                         | 0.62 (0.62,0.63)                         |
| Opioid use disorder                               | 18644 (38.7)           | 56 (0.1)         | 17929 (37.3)              | 659 (1.4)                   | 0.83                   | 0.03              | 0.91              | 0.02 (0.02,0.03)  | 0.02 (0.01,0.02)                                                                | 1.00 (1.00,1.00)        | 0.80 (0.73,0.86)                         | 0.83 (0.83,0.84)                         |
| Any selected mental health disorders              | 16034 (33.3)           | 1330 (2.8)       | 5569 (11.6)               | 9135 (19.0)                 | 0.86                   | 0.73              | 0.90              | 0.63 (0.62,0.64)  | 0.62 (0.61,0.63)                                                                | 0.96 (0.96,0.96)        | 0.87 (0.87,0.88)                         | 0.85 (0.85,0.86)                         |
| Mood disorders <sup>c</sup>                       | 3199 (6.6)             | 687 (1.4)        | 1904 (4.0)                | 608 (1.3)                   | 0.92                   | 0.39              | 0.95              | 0.35 (0.34,0.37)  | 0.28 (0.26,0.29)                                                                | 0.99 (0.98,0.99)        | 0.66 (0.64,0.68)                         | 0.93 (0.92,0.93)                         |
| Depression                                        | 927 (1.9)              | 59 (0.1)         | 843 (1.8)                 | 25 (0.1)                    | 0.95                   | 0.32              | 0.97              | 0.29 (0.27,0.31)  | 0.24 (0.23,0.26)                                                                | 0.99 (0.98,0.99)        | 0.47 (0.44,0.50)                         | 0.96 (0.96,0.96)                         |
| Psychoses                                         | 3192 (6.6)             | 49 (0.1)         | 3043 (6.3)                | 100 (0.2)                   | 0.91                   | 0.72              | 0.94              | 0.67 (0.66,0.68)  | 0.70 (0.69,0.71)                                                                | 0.95 (0.95,0.95)        | 0.75 (0.74,0.76)                         | 0.94 (0.93,0.94)                         |
| Neurotic/stress/somatoform disorders <sup>d</sup> | 10387 (21.6)           | 1976 (4.1)       | 2523 (5.2)                | 5888 (12.2)                 | 0.95                   | 0.10              | 0.97              | 0.09 (0.07,0.10)  | 0.06 (0.05,0.07)                                                                | 0.99 (0.99,0.99)        | 0.31 (0.27,0.36)                         | 0.95 (0.95,0.95)                         |
| Anxiety disorders                                 | 5348 (11.1)            | 672 (1.4)        | 3380 (7.0)                | 1296 (2.7)                  | 0.98                   | 0.05              | 0.99              | 0.05 (0.03,0.07)  | 0.03 (0.02,0.04)                                                                | 1.00 (1.00,1.00)        | 0.30 (0.20,0.41)                         | 0.98 (0.98,0.98)                         |
| Personality disorders                             | 2803 (5.8)             | 333 (0.7)        | 2319 (4.8)                | 151 (0.3)                   | 0.94                   | 0.06              | 0.97              | 0.06 (0.04,0.07)  | 0.03 (0.03,0.04)                                                                | 1.00 (1.00,1.00)        | 0.67 (0.59,0.75)                         | 0.94 (0.93,0.94)                         |

Abbreviations: ED, emergency department; CI: confidence interval; <sup>b</sup>Included opioid use disorder; <sup>c</sup>Included depression; <sup>d</sup>Included anxiety disorders.

**Table 3A.** Factors associated with discordance between the primary diagnosis code assigned in the emergency department and any diagnosis codes assigned at hospital discharge following an emergency department visit<sup>a</sup>

| Characteristics                        | Outcomes: Discordance in identifying                 |                                       |                                                 |
|----------------------------------------|------------------------------------------------------|---------------------------------------|-------------------------------------------------|
|                                        | Mental health and substance use disorders (N=30,722) | Any selected substance use (N=23,688) | Any selected mental health disorders (N=16,017) |
|                                        | Odds Ratios (95% CI)                                 |                                       |                                                 |
| Male                                   | <b>0.86 (0.79,0.93)</b>                              | 0.94 (0.82,1.08)                      | <b>0.89 (0.81,0.98)</b>                         |
| Age at visit                           |                                                      |                                       |                                                 |
| >=65                                   | Reference                                            | Reference                             | Reference                                       |
| 55-64                                  | <b>0.68 (0.59,0.77)</b>                              | 1.12 (0.87,1.45)                      | <b>0.41 (0.34,0.49)</b>                         |
| 45-54                                  | <b>0.48 (0.43,0.55)</b>                              | 1.06 (0.83,1.35)                      | <b>0.36 (0.30,0.43)</b>                         |
| 35-44                                  | <b>0.31 (0.27,0.35)</b>                              | 1.05 (0.82,1.35)                      | <b>0.28 (0.24,0.33)</b>                         |
| 25-34                                  | <b>0.25 (0.22,0.28)</b>                              | 1.28 (0.99,1.66)                      | <b>0.27 (0.22,0.32)</b>                         |
| <25                                    | <b>0.23 (0.20,0.27)</b>                              | 1.12 (0.82,1.53)                      | <b>0.35 (0.29,0.43)</b>                         |
| Ever residing in DTES <sup>b</sup>     | <b>1.45 (1.33,1.58)</b>                              | 1.20 (1.04,1.39)                      | 1.09 (0.99,1.20)                                |
| Homeless at time of visit <sup>c</sup> | 0.91 (0.84,1.00)                                     | <b>0.79 (0.69,0.91)</b>               | <b>1.11 (1.00,1.23)</b>                         |
| Year of visit                          |                                                      |                                       |                                                 |
| 2007-2011                              | Reference                                            | Reference                             | Reference                                       |
| 2012-2014                              | <b>0.74 (0.68,0.79)</b>                              | <b>0.61 (0.53,0.70)</b>               | 0.93 (0.85,1.02)                                |
| 2015-2017                              | <b>0.74 (0.68,0.80)</b>                              | <b>0.75 (0.64,0.87)</b>               | 0.95 (0.86,1.05)                                |
| Day of visit                           |                                                      |                                       |                                                 |
| Weekday                                | Reference                                            | Reference                             | Reference                                       |
| Weekend                                | <b>1.22 (1.14,1.30)</b>                              | 0.89 (0.79,1.00)                      | <b>1.30 (1.19,1.41)</b>                         |
| Holiday                                | <b>1.38 (1.13,1.69)</b>                              | 0.96 (0.67,1.39)                      | <b>1.67 (1.31,2.14)</b>                         |
| Time of visit                          |                                                      |                                       |                                                 |
| 9:00 AM-8.59 PM                        | Reference                                            | Reference                             | Reference                                       |
| 9:00 PM-8.59 AM                        | <b>1.40 (1.31,1.49)</b>                              | 0.92 (0.82,1.03)                      | <b>1.34 (1.24,1.45)</b>                         |
| Triage acuity at ED                    |                                                      |                                       |                                                 |
| Semi to none urgent                    | Reference                                            | Reference                             | Reference                                       |
| Urgent                                 | <b>0.78 (0.71,0.86)</b>                              | <b>0.60 (0.49,0.73)</b>               | <b>1.15 (1.01,1.30)</b>                         |
| Resuscitation-Emergency                | <b>0.79 (0.71,0.87)</b>                              | <b>0.64 (0.52,0.80)</b>               | <b>1.19 (1.04,1.35)</b>                         |
| Emergency department hospital          |                                                      |                                       |                                                 |
| St Paul hospital                       | Reference                                            | Reference                             | Reference                                       |
| Lions gate hospital                    | <b>0.56 (0.45,0.71)</b>                              | <b>0.35 (0.25,0.48)</b>               | <b>1.52 (1.17,1.97)</b>                         |
| Mount Saint Joseph hospital            | <b>1.34 (1.11,1.61)</b>                              | <b>0.34 (0.26,0.44)</b>               | <b>2.51 (1.78,3.53)</b>                         |
| Other                                  | 0.70 (0.28,1.71)                                     | 0.63 (0.12,3.38)                      | 1.13 (0.41,3.10)                                |
| Richmond hospital                      | 1.14 (0.96,1.36)                                     | <b>0.36 (0.28,0.46)</b>               | <b>3.35 (2.69,4.17)</b>                         |
| Vancouver general hospital             | <b>0.52 (0.48,0.56)</b>                              | <b>0.85 (0.75,0.97)</b>               | <b>0.77 (0.71,0.84)</b>                         |
| Length of ED visit                     |                                                      |                                       |                                                 |
| < 6 hours                              | Reference                                            | Reference                             | Reference                                       |
| >=6 hours                              | <b>0.88 (0.81,0.95)</b>                              | <b>0.53 (0.44,0.64)</b>               | <b>1.36 (1.23,1.51)</b>                         |

<sup>a</sup> Among visits with either hospital or emergency department record indicating a case.

<sup>b</sup> Determined by known postal code or homeless user of VCH services, or DTES indication in CommunityMart data

<sup>c</sup> Determined by presence of postal code V6Y2A1 (used if no fixed address or postal code in discharge abstract database/emergency department database); postal code "XX" (used for transient/homeless populations in discharge abstract database/EDMart); postal code AOA OAO (assigned if no postal code for visit in EDMart and CommunityMart); indication of homelessness in EDMart/CommunityMart data
